# Supplementary material
Source: publisher figshare collection journal article supplement (https://tandf.figshare.com/ndownloader/files/14748188)
Supplement: Supplementary file 1 [file 14748188]

# Appendices

**Appendix A: Decentralized Supply chain**

In the decentralized setting, we first solve the retailer’s problem.

|  |  |
| --- | --- |

Now, the first order conditions are given by

|  |  |
| --- | --- |
|  |  |

The second order conditions are also given by

|  |  |
| --- | --- |

So, the determinant of the Hessian matrix is. Therefore, the Hessian matrix is negative definite. Thus, the profit function of the retailer is a joint concave in

Solve the equations and for and , we get,

|  |  |
| --- | --- |
|  |  |

Using and , the order quantity becomes

|  |  |
| --- | --- |

Therefore, the manufacturer problem becomes

|  |  |  |
| --- | --- | --- |

The first order conditions are given by

|  | | |  |
| --- | --- | --- | --- |
|  | | | |
|  |  | |  |
|  | | |
|  | |  |  |

The second order conditions are also given by

, ,

, ,

, .

Now, we check the concavity of the manufacturer’s profit function.

The first principal minor of the Hessian matrix is given by

| , since according to our assumption. |  |
| --- | --- |

The second principal minor of the Hessian matrix is given by

| , by assumption. |  |
| --- | --- |

The determinant of the Hessian matrix is given by

|  | | |  | |
| --- | --- | --- | --- | --- |
|  | , | | | |
|  | , | according to our assumption. | |  |

From equations, we can say that the Hessian matrix is negative definite and hence the manufacturer’s profit function is a joint concave function in.

Now, we solve the equations . The optimal values of the manufacturer’s decisions are given by

|  |  |
| --- | --- |

Using , the equations become,

|  |  |
| --- | --- |
|  |  |

**Appendix B: Centralized Supply chain**

In the centralized supply chain, the total supply chain profits are given by

|  | | |
| --- | --- | --- |
|  |  |  |

Now, the first order conditions are given by

|  | | |  |
| --- | --- | --- | --- |
|  | | | |
|  |  |  | |
|  | |  | |
|  | |  | |

The second order conditions are also given by

|  |  |
| --- | --- |

, , ,

, , .

Now, we check the concavity of the centralized profit function.

The first order principal minor of the Hessian matrix is given by

|  |  |
| --- | --- |

The second order principal minor of the Hessian matrix is given by

| , according to our assumption. |  |
| --- | --- |

The third order principal minor of the Hessian matrix is given by

|  |  |
| --- | --- |
| , by assumption. |  |

The determinant of the Hessian matrix is given by

|  | | |
| --- | --- | --- |
|  |  |  |

From equationswe can say that the Hessian matrix is negative definite and hence the manufacturer’s profit function is a joint concave function in

Now, we solve the equations . The optimal values of the decision variables are given by

|  |  |
| --- | --- |
|  |  |
